# Supplementary material for: Increased L-glutamate production from aerial nitrogen using Klebsiella pasteurii with modified citrate synthase
Source: Research Square preprint supplement (doi:10.21203/rs.3.rs-7326138/v1), 2025-09-03
Supplement: Supplementary file 1 [file 601ada1720b65ed4dbabbddc.docx]

**Inventory of Supplementary Information**

**Increased L-glutamate production from aerial nitrogen using *Klebsiella pasteurii* with modified citrate synthase**

Daisuke Yoshidome, Keitaro Kuze, Atsushi Ichiyanagi, Ayako Yoshida, Saori Kosono, and Makoto Nishiyama

Supplementary Fig. 1. Comparison of culture profiles of CgCS+CitS and KpCS+CitS strains of *K. pasteurii* in ϕ25 test tubes and ϕ90 plates.

Supplementary Fig. 2. Extracellular L-glutamate production using KpCS variants modified at both of His227 and Val362.

Supplementary Fig. 3. SDS-PAGE for purified KpCS.

Supplementary Fig. 4. Fitting the Michaelis-Menten equation.

Supplementary Fig. 5. Determining IC50 of 2-OG.

Supplementary Table 1. Plasmids used in this study.

Supplementary Table 2. Oligonucleotide primers used in this study.

Supplementary References

**a**

**b**

CgCS+CitS (test tube)

KpCS+CitS (test tube)

CgCS+CitS (plate)

KpCS+CitS (plate)

**Supplementary Fig. 1. Comparison of culture profiles of CgCS+CitS and KpCS+CitS strains of *K. pasteurii* in ϕ25 test tubes and ϕ90 plates.**

(**a**) Nitrogenase activity. (**b**) Extracellular L-Glu production.

*K. pasteurii* strain (CgCS+CitS strain, black lines) overproducing CgCS and citrate transporter CitS or *K. pasteurii* strain (KpCS+CitS strain, red lines) overproducing KpCS and CitS was cultured statically under air in ϕ25 test tubes containing 5 mL of KDC medium (solid lines) or ϕ90 plates containing 25 mL of KDC medium (dotted lines). The height of the medium was set to 0.6 cm from the bottom of the vessel in both conditions. Nitrogenase activity and extracellular L-Glu production were measured at each time point using independent triple biological replicates. Data are shown as the mean of three biological replicates with standard deviation.

**a**

**b**

**Supplementary Fig. 2. Extracellular L-glutamate production using KpCS variants modified at both of His227 and Val362.**

Extracellular L-Glu production of KpCS* strains with the double replacements at His227 and Val362 at day 4 (**a**) and KpCS*+CitS strains with the same double replacements at His227 and Val362 at day 6 (**b**). These strains were cultured in KDC medium was measured using independent triple biological replicates. Data are shown as the mean of three biological replicates with standard deviation.


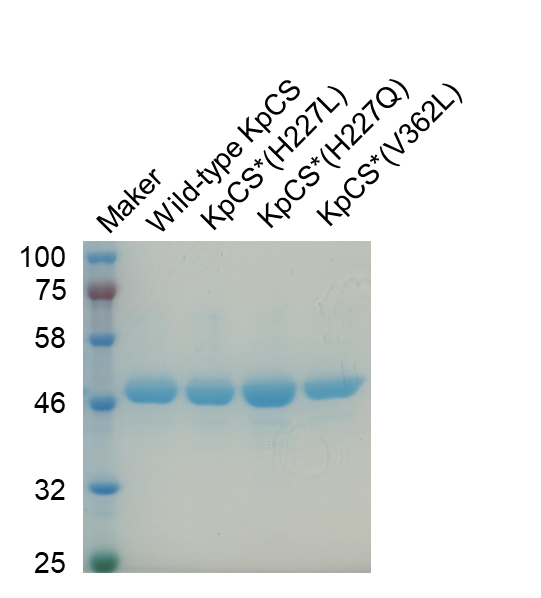


**Supplementary Fig. 3.** **SDS-PAGE for purified KpCS.**

The production of the wild-type KpCS and KpCS variants (47.9 kDa) was confirmed.


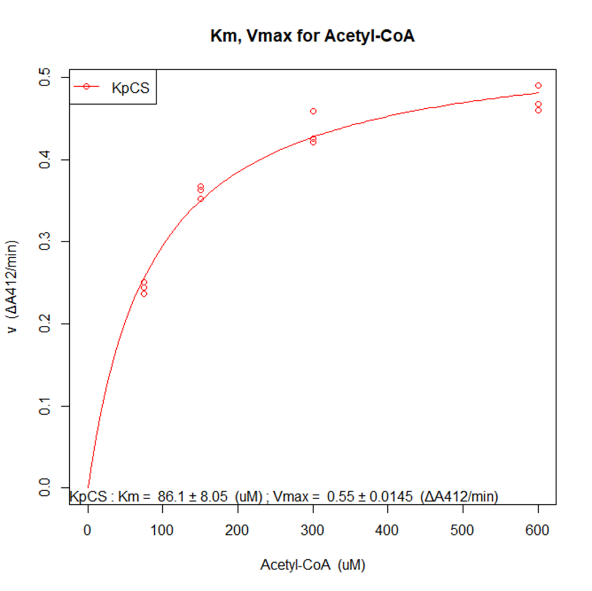

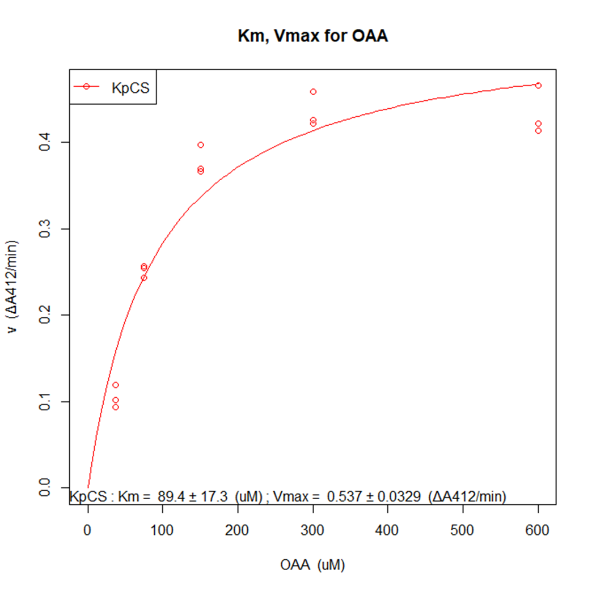


**b**

**a**

**c**


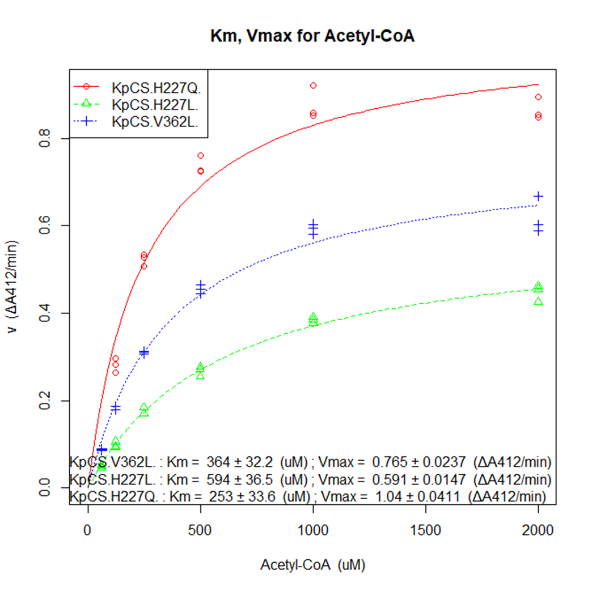

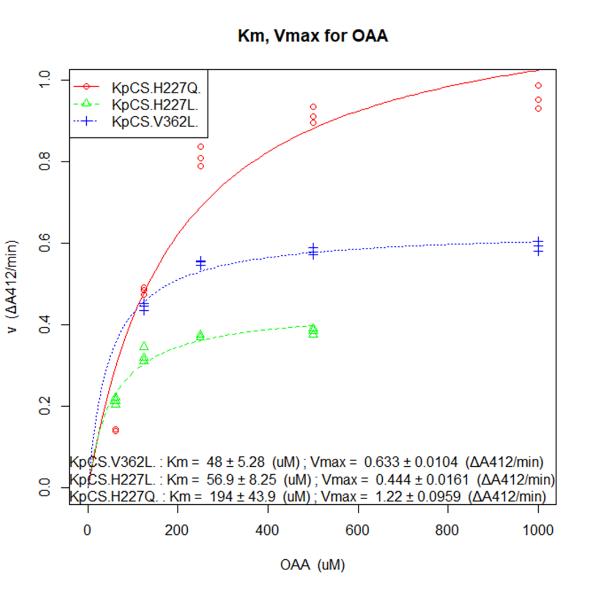


**d**

**Supplementary Fig. 4. Fitting the Michaelis-Menten equation.**

Increase in absorbance at 412 nm in 1 min. of each purified KpCSs was measured and plotted (**a**, **b, c, d**). For analysis of the apparent *K*m and *k*cat values of wild-type KpCS, KpCS*(H227Q), KpCS*(H227L), and KpCS*(V362L) for acetyl-CoA, OAA was constant at 300, 2000, 500, 1000 µM, respectively (**a, c**). For analysis of the apparent *K*m and *k*cat values of wild-type KpCS, KpCS*(H227Q), KpCS*(H227L), and KpCS*(V362L) for OAA, acetyl-CoA was constant at 300, 2000, 1000, 1000 µM, respectively (**b, d**). Fitting the Michaelis-Menten equation was conducted by the methods of Huitema and Horsman (2018) using the statistical program R.

KpCS(H227Q)

(IC50: 1.14 ± 0.07 mM)

KpCS

(IC50: 0.77 ± 0.03 mM)

**a**

**b**

**d**

**c**

KpCS(H227L)

(IC50: 13.9 ± 0.6 mM)

KpCS(V362L)

(IC50: 10.7 ± 0.36 mM)

**Supplementary Fig. 5. Determining IC50 of 2-OG.**

Increase in absorbance at 412 nm in 1 min. of each purified KpCSs was measured and plotted (**a**~**d**). OAA and acetyl-CoA were constant at 300 µM and various concentration of 2-OG was added to the reaction culture. Calculation of IC50 of 2-OG was conducted by the methods of Huitema and Horsman (2018) using the statistical program R.

**Supplementary Table 1. Plasmids used in this study.**

| Name | Description | | Primers (Template) |
| --- | --- | --- | --- |
| pKCT | Expression of CitS gene under the *trc* promoter, pCDF *ori*, SpcR | Yoshidome et al. 2024 | - |
| pCCS | Expression of CgCS gene under the *trc* promoter, pSC101 *ori*, TetR | Yoshidome et al. 2024 | - |
| pKCS | Expression of wild-type KpCS gene under the *trc* promoter, pSC101 *ori*, TetR | Yoshidome et al. 2024 | - |
| pKCS(H227K) | Expression of KpCS(H227K) gene under the *trc* promoter, pSC101 *ori*, TetR | this study | 1-2 (pKCS) |
| pKCS(H227R) | Expression of KpCS(H227R) gene under the *trc* promoter, pSC101 *ori*, TetR | this study | 3-4 (pKCS) |
| pKCS(H227E) | Expression of KpCS(H227E) gene under the *trc* promoter, pSC101 *ori*, TetR | this study | 5-6 (pKCS) |
| pKCS(H227D) | Expression of KpCS(H227D) gene under the *trc* promoter, pSC101 *ori*, TetR | this study | 7-8 (pKCS) |
| pKCS(H227Q) | Expression of KpCS(H227Q) gene under the *trc* promoter, pSC101 *ori*, TetR | this study | 9-10 (pKCS) |
| pKCS(H227N) | Expression of KpCS(H227N) gene under the *trc* promoter, pSC101 *ori*, TetR | this study | 11-12 (pKCS) |
| pKCS(H227L) | Expression of KpCS(H227L) gene under the *trc* promoter, pSC101 *ori*, TetR | this study | 13-14 (pKCS) |
| pKCS(H227W) | Expression of KpCS(H227W) gene under the *trc* promoter, pSC101 *ori*, TetR | this study | 15-16 (pKCS) |
| pKCS(V362K) | Expression of KpCS(V362K) gene under the *trc* promoter, pSC101 *ori*, TetR | this study | 17-18 (pKCS) |
| pKCS(V362R) | Expression of KpCS(V362R) gene under the *trc* promoter, pSC101 *ori*, TetR | this study | 19-20 (pKCS) |
| pKCS(V362E) | Expression of KpCS(V362E) gene under the *trc* promoter, pSC101 *ori*, TetR | this study | 21-22 (pKCS) |
| pKCS(V362D) | Expression of KpCS(V362D) gene under the *trc* promoter, pSC101 *ori*, TetR | this study | 23-24 (pKCS) |
| pKCS(V362Q) | Expression of KpCS(V362Q) gene under the *trc* promoter, pSC101 *ori*, TetR | this study | 25-26 (pKCS) |
| pKCS(V362N) | Expression of KpCS(V362N) gene under the *trc* promoter, pSC101 *ori*, TetR | this study | 27-28 (pKCS) |
| pKCS(V362L) | Expression of KpCS(V362L) gene under the *trc* promoter, pSC101 *ori*, TetR | this study | 29-30 (pKCS) |
| pKCS(V362W) | Expression of KpCS(V362W) gene under the *trc* promoter, pSC101 *ori*, TetR | this study | 31-32 (pKCS) |
| pKCS(H227Q-Cstrep) | Expression of KpCS(H227Q-Cstrep) gene under the *trc* promoter, pSC101 *ori*, TetR | this study | 33-34 (pKCS(H227Q)) |
| pKCS(H227L-Cstrep) | Expression of KpCS(H227L-Cstrep) gene under the *trc* promoter, pSC101 *ori*, TetR | this study | 33-34 (pKCS(H227L)) |
| pKCS(V362L-Cstrep) | Expression of KpCS(V362L-Cstrep) gene under the *trc* promoter, pSC101 *ori*, TetR | this study | 33-34 (pKCS(V362L)) |

**Supplementary Table 2. Oligonucleotide primers used in this study.**

| No. | Name | Sequence (5’ to 3’) |
| --- | --- | --- |
| 1 | KpCS(H227K)-F | ATCCTGAAAGCCGACCACGAACAAAACG |
| 2 | KpCS(H227K)-R | GTCGGCTTTCAGGATCAGGATACGGTC |
| 3 | KpCS(H227R)-F | ATCCTGCGCGCCGACCACGAACAAAACG |
| 4 | KpCS(H227R)-R | GTCGGCGCGCAGGATCAGGATACGGTC |
| 5 | KpCS(H227E)-F | ATCCTGGAAGCCGACCACGAACAAAACG |
| 6 | KpCS(H227E)-R | GTCGGCTTCCAGGATCAGGATACGGTC |
| 7 | KpCS(H227D)-F | ATCCTGGATGCCGACCACGAACAAAACG |
| 8 | KpCS(H227D)-R | GTCGGCATCCAGGATCAGGATACGGTC |
| 9 | KpCS(H227Q)-F | TCCTGCAAGCCGACCACGAACAAAACGCTTCGACC |
| 10 | KpCS(H227Q)-R | GGTCGGCTTGCAGGATCAGGATACGGTCCATCG |
| 11 | KpCS(H227N)-F | ATCCTGAACGCCGACCACGAACAAAACG |
| 12 | KpCS(H227N)-R | GTCGGCGTTCAGGATCAGGATACGGTC |
| 13 | KpCS(H227L)-F | ATCCTGCTGGCCGACCACGAACAAAACG |
| 14 | KpCS(H227L)-R | GTCGGCCAGCAGGATCAGGATACGGTC |
| 15 | KpCS(H227W)-F | ATCCTGTGGGCCGACCACGAACAAAACG |
| 16 | KpCS(H227W)-R | GTCGGCCCACAGGATCAGGATACGGTC |
| 17 | KpCS(V362K)-F | CCTAACAAAGATTTCTACTCCGGTATC |
| 18 | KpCS(V362K)-R | GAAATCTTTGTTAGGGTAAAGTTTCTTC |
| 19 | KpCS(V362R)-F | CCTAACCGCGATTTCTACTCCGGTATC |
| 20 | KpCS(V362R)-R | GAAATCGCGGTTAGGGTAAAGTTTCTTC |
| 21 | KpCS(V362E)-F | CCTAACGAAGATTTCTACTCCGGTATC |
| 22 | KpCS(V362E)-R | GAAATCTTCGTTAGGGTAAAGTTTCTTC |
| 23 | KpCS(V362D)-F | CCTAACGATGATTTCTACTCCGGTATC |
| 24 | KpCS(V362D)-R | GAAATCATCGTTAGGGTAAAGTTTCTTC |
| 25 | KpCS(V362Q)-F | CCTAACCAGGATTTCTACTCCGGTATC |
| 26 | KpCS(V362Q)-F | GAAATCCTGGTTAGGGTAAAGTTTCTTC |
| 27 | KpCS(V362N)-F | CCTAACAACGATTTCTACTCCGGTATC |
| 28 | KpCS(V362N)-R | GAAATCGTTGTTAGGGTAAAGTTTCTTC |
| 29 | KpCS(V362L)-F | CCTAACCTGGATTTCTACTCCGGTATC |
| 30 | KpCS(V362L)-R | GAAATCCAGGTTAGGGTAAAGTTTCTTC |
| 31 | KpCS(V362W)-F | CCTAACTGGGATTTCTACTCCGGTATC |
| 32 | KpCS(V362W)-R | GAAATCCCAGTTAGGGTAAAGTTTCTTC |
| 33 | KpCS-Cstrep-F | GAGCCATCCGCAGTTTGAAAAGTAAGAATTCGAGCTCGGTACC |
| 34 | KpCS-Cstrep-R | CTTTTCAAACTGCGGATGGCTCCAACCACCGCGGGCGATATCGTTTTTGAAATCG |

**Supplementary References**

Huitema C, Horsman G (2018) Analyzing enzyme kinetic data using the powerful statistical capabilities of R. bioRxiv:316588

Yoshidome D, Hidaka M, Miyanaga T, Ito Y, Kosono S, Nishiyama M (2024) Glutamate production from aerial nitrogen using the nitrogen-fixing bacterium *Klebsiella oxytoca*. Commun Biol 7:443
